# Supplementary material
Source: PubMed Central journal article supplement (PMC3121321)
Supplement: supp_kwq497_kwq497_Chao_Web_Appendix.pdf [file supp_kwq497_kwq497_Chao_Web_Appendix.pdf]

## WEB APPENDIX

### Planning Control of Pandemic Influenza H1N1 in Los Angeles County and the United States

Dennis L. Chao<sup>1</sup>, Laura Matrajt<sup>1,2</sup>, Nicole E. Basta<sup>1,3</sup>, Jonathan D. Sugimoto<sup>1,3</sup>, Brandon Dean<sup>4</sup>, Dee Ann Bagwell<sup>4</sup>, Brit Ojulfstad<sup>4</sup>, M. Elizabeth Halloran<sup>1,5</sup>, Ira M. Longini, Jr.<sup>1,5,\*</sup>

<sup>1</sup> Center for Statistics and Quantitative Infectious Diseases, Vaccine and Infectious Disease Division, Fred Hutchinson Cancer Research Center, Seattle, Washington, USA

<sup>2</sup> Department of Applied Mathematics, University of Washington, Seattle, Washington, USA

<sup>3</sup> Department of Epidemiology, School of Public Health, University of Washington, Seattle, Washington, USA

<sup>4</sup> Emergency Preparedness and Response Program, Los Angeles County Department of Public Health, Los Angeles, California, USA

<sup>5</sup> Department of Biostatistics, School of Public Health, University of Washington, Seattle, Washington, USA

\* Correspondence to Dr. Ira M. Longini, Jr., Fred Hutchinson Cancer Research Center, 1100 Fairview Avenue N, Seattle, WA 98109 (e-mail: longini@scharp.org).

## **Web Movies**

**Web Movie 1.** Prevalence of pandemic H1N1 cases in the continental United States with and without vaccine. The top panel displays both a plot and a heat map of prevalence of cases by census tract in a simulation of the continental United States without vaccination. The bottom panel displays the corresponding plot for a simulation with vaccine distributed according to CDC estimates.

**Web Movie 2.** Prevalence of pandemic H1N1 cases in the continental United States with early arrival of vaccine. The top panel displays both a plot and a heat map of prevalence of cases by census tract in a simulation of the continental United States without vaccination. The bottom panel displays the corresponding plot for a simulation in which vaccine was distributed one month earlier than had actually occurred.

## IMMUNITY FROM INFECTIONS OCCURRING IN SPRING/SUMMER 2009

To determine the number of simulated individuals who should have immunity from prior exposure to pandemic H1N1, we estimated the number of individuals in the United States infected with pandemic H1N1 by early September. An estimated 3 million individuals in the United States were infected by late July of 2009 [1] (Web Table 1). The age-specific illness attack rates can be derived by dividing the age-specific numbers of cases by the size of the US population, as reported in US census resident estimates from July 2009 [2].

In late July, there were 5009 lab-confirmed hospitalizations and 302 lab-confirmed deaths in the United States. By early September, the Centers for Disease Control reported 9079 hospitalizations and 593 deaths (<http://www.cdc.gov/h1n1flu/updates/090409.htm>, posted Sept 4). Because there were approximately twice as many lab-confirmed deaths and lab-confirmed hospitalizations in early September as there were in late July, we estimate that twice as many people, or 6 million, had been infected by early September. We assume that 67% of those infected became symptomatic, as is the case with seasonal influenza [3, 4]. Therefore, the September infection attack rates are three times higher than the illness attack rates in July (Web Table 1).

To estimate the attack rate for the 19–29 age group, we take the weighted sum (based on the fraction of the July 2009 US population in the appropriate age groups) of the 5–24 and the 25–49 rates, which is 1.456% for July (and 4.37% for September). We used the same procedure to estimate the attack rate for the 30–64 age group and found it to be 0.476% for July (and 1.43% for September).

**Web Table 1.** Estimated Numbers and Proportions of Individuals Infected With Pandemic H1N1 in the United States by Late July and Early September.

|             | late July cases | late July illness attack rate | early Sept infection attack rate |
|-------------|-----------------|-------------------------------|----------------------------------|
| 0–4 years   | 397033          | 1.87%                         | 5.60%                            |
| 5–24 years  | 1820284         | 2.19%                         | 6.58%                            |
| 25–49 years | 612862          | 0.58%                         | 1.73%                            |
| 50–64 years | 180297          | 0.32%                         | 0.95%                            |
| 65+ years   | 42292           | 0.01%                         | 0.04%                            |
| Total       | 3052768         | 1.00%                         | 2.99%                            |

## VACCINE EFFICACY

We use estimates from seasonal influenza vaccines [5] for pandemic H1N1 vaccine efficacy (summarized in Web Table 2). In our simulations, individuals acquire maximum protection 8–10 days after a single dose of vaccine (Web Figure 1). The live, attenuated vaccine has a slightly higher efficacy than inactivated vaccine in our simulations (Web Table 2). For all vaccines, children under 10 require 2 doses: the first confers 70% of the maximum efficacy after two weeks, and the second, which must be given at least three weeks after the first, takes one week to confer the remaining 30%. Vaccine may be less effective in the elderly (> 65 years), so the simulated vaccine efficacy is reduced by 40% in the elderly.

**Web Table 2.** Expected Efficacies (%) for Influenza Vaccines With a Homologous Match to the Wild Virus (From Basta, et al. [5]).

| Vaccine efficacy parameter | Inactivated | Live attenuated |
|----------------------------|-------------|-----------------|
| VES                        | 40          | 40              |
| VEP                        | 67          | 83              |
| VESP                       | 80          | 90              |
| VEI                        | 40          | 50              |

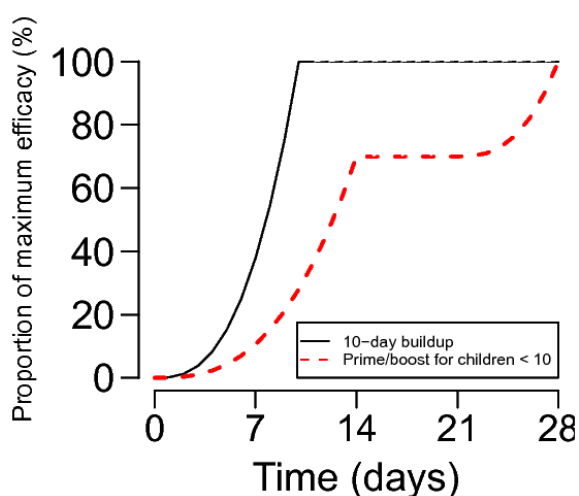

**Web Figure 1.** Plot of modeled vaccine efficacies over time. Maximum attainable efficacy is reached 10 days after one dose of vaccine (solid black line). For the homologous inactivated vaccine (Web Table 2), the vaccine efficacy for infection (VES) reaches 40%; symptomatic illness given infection (VEP) reaches 67%; symptomatic illness with infection (VESP) reaches 80%; infectiousness (VEI) reaches 40%; and finally combined efficacy (VEC) reaches 78% after the second. Children under 10 require a booster shot 21 days after the first dose (red dashed line). We assume that 70% of maximum efficacy is achieved after the first dose.

## VACCINE RESTRICTIONS

Nine different pandemic H1N1 vaccine formulations produced by five manufacturers were distributed in the United States during the 2009–2010 influenza season. Influenza vaccines are licensed for specific age groups, and some are prohibited for use in pregnant women. Live, attenuated vaccine is likely to be used mostly in children (up to 18 years old) (because it is easier to administer and it may be more effective in children than adults [6]), and only in those without certain medical conditions, which restricts its use to about 80% of children between 0–18. It is also licensed for adults < 50, so in the simulation it is administered to adults between 19–29 who are not pregnant. Multi-dose vials of inactivated vaccine contain thimerosal, so are not given to children under 5 or to pregnant women. Fluzone pre-filled syringes (PFS) 7.5 µg/dose are given only to children under 5. Pre-filled syringes containing 15 µg of Fluzone or Fluvirin are given only to individuals 5 and older, while PFS 15 µg of Afluria are given to those 19 and up. No vaccine is licensed for infants (<6 months), so they are never vaccinated in the simulations.

## VACCINE AVAILABILITY

The vaccine supply in the simulation followed the CDC’s vaccine allocation schedule released on December 25, 2009 (Web Table 3). Vaccine is distributed pro rata, so LA County received a portion proportionate to its population (3.195% of the total supply for the United States). We assumed that the amount of vaccine allocated each week would be deployed in LA County 9 days later, and 1/7 of the week’s supply would be administered each day starting that day. Although the projections indicated that there would be enough vaccine to cover half of the US population, estimates indicate that only 20% of the population was vaccinated [7]. Therefore, we ignored vaccine allocations after November 27, 2009.

**Web Table 3.** US Pandemic H1N1 Vaccine Supply (From [8]).

| Allocation date | FluZone PFS 7.5µg | FluZone PFS 15µg | FluZone MDV | FluVirin PFS | FluVirin MDV | Afluria PFS | Afluria MDV | FluLaval MDV | FluMist   | Total      | Cumulative total |
|-----------------|-------------------|------------------|-------------|--------------|--------------|-------------|-------------|--------------|-----------|------------|------------------|
| 10/02/09        | 0                 | 0                | 0           | 0            | 0            | 0           | 0           | 0            | 2,380,300 | 2,380,300  | 2,380,300        |
| 10/09/09        | 0                 | 0                | 3,149,400   | 183,700      | 0            | 0           | 0           | 0            | 2,039,200 | 5,372,300  | 7,752,600        |
| 10/16/09        | 0                 | 0                | 2,928,100   | 336,400      | 0            | 0           | 0           | 0            | 1,351,600 | 4,616,100  | 12,368,700       |
| 10/23/09        | 0                 | 0                | 1,619,500   | 672,600      | 0            | 0           | 0           | 0            | 1,420,300 | 3,712,400  | 16,081,100       |
| 10/30/09        | 1,318,900         | 0                | 4,411,500   | 1,707,000    | 1,128,800    | 464,700     | 0           | 0            | 1,574,400 | 10,605,300 | 26,686,400       |
| 11/06/09        | 960,700           | 0                | 1,732,500   | 2,159,400    | 4,214,600    | 492,200     | 0           | 0            | 1,792,300 | 11,351,700 | 38,038,100       |
| 11/13/09        | 1,080,500         | 0                | 1,262,800   | 813,600      | 884,800      | 278,000     | 0           | 0            | 651,600   | 4,971,300  | 43,009,400       |
| 11/20/09        | 811,700           | 194,900          | 3,208,200   | 465,900      | 4,479,600    | 152,800     | 322,400     | 0            | 1,500,400 | 11,135,900 | 54,145,300       |
| 11/27/09        | 305,600           | 322,100          | 1,740,400   | 299,700      | 3,341,900    | 0           | 0           | 0            | 2,182,800 | 8,192,500  | 62,337,800       |
| 12/04/09        | 9,000             | 667,000          | 1,338,600   | 1,326,800    | 4,310,000    | 0           | 0           | 0            | 2,624,700 | 10,276,100 | 72,613,900       |
| 12/11/09        | 0                 | 1,164,500        | 7,869,100   | 412,500      | 2,589,100    | 0           | 0           | 0            | 2,194,000 | 14,229,200 | 86,843,100       |
| 12/18/09        | 0                 | 1,323,800        | 7,882,300   | 490,000      | 1,321,000    | 191,900     | 155,700     | 0            | 1,874,900 | 13,239,600 | 100,082,700      |
| 12/25/09        | 0                 | 2,384,100        | 3,002,900   | 904,900      | 2,053,900    | 627,800     | 217,100     | 0            | 1,204,300 | 10,395,000 | 110,477,700      |
| 01/01/10        | 0                 | 2,100,000        | 8,500,000   | 325,000      | 1,900,000    | 1,122,130   | 129,800     | 0            | 2,300,000 | 16,376,930 | 126,854,630      |
| 01/08/10        | 0                 | 900,000          | 8,200,000   | 900,000      | 4,000,000    | 388,300     | 0           | 630,000      | 3,500,000 | 18,518,300 | 145,372,930      |
| 01/15/10        | 0                 | 943,600          | 930,000     | 902,500      | 2,076,300    | 0           | 0           | 630,000      | 2,100,000 | 7,582,400  | 152,955,330      |
| 01/23/10        | 0                 | 0                | 2,800,000   | 0            | 0            | 0           | 0           | 3,810,000    | 2,100,000 | 8,710,000  | 161,665,330      |
| 01/30/10        | 0                 | 0                | 3,100,000   | 0            | 0            | 0           | 0           | 0            | 2,100,000 | 5,200,000  | 166,865,330      |

## VACCINE PRIORITIZATION

The Advisory Committee on Immunization Practices (ACIP) recommended that the following groups be prioritized for pandemic H1N1 vaccination in the 2009 season if a large amount of vaccine were available: pregnant women, people who live with or care for children younger than 6 months of age, health care and emergency services personnel with direct patient contact, children 6 months through 4 years of age, children 5 through 18 years of age who have chronic medical conditions, and people from ages 25 through 64 years who are at higher risk for complications from novel H1N1 because of chronic health disorders or compromised immune systems [9]. If there was sufficient vaccine, the first priority tier was expanded to include: health care and emergency services personnel without direct patient contact and persons between the ages of 6 months through 24 years of age.

In our simulations, we implemented a three-tier priority system that reflects the actual distribution of vaccine in the fall of 2009. The highest priority individuals were pregnant women, family members of children less than six months old, health care and emergency services personnel with direct patient contact, and high-risk individuals from 6 months to 64 years old. The second tier included healthy children (ages 6 months to 18 years), and the third tier was the remaining population, which included healthy adults and the elderly.

We matched the prioritized categories of individuals to our simulator's by taking the estimated fraction of the US population in a category and randomly assigning that proportion of simulated individuals of the appropriate age to be prioritized. The simulation has US population of about 279,583,437 (based on the 2000 continental US), while the current US population is about 307,000,000.

Infants (<6 months) can not get vaccinated, but their family members are prioritized to receive vaccine. In 2000, 3,805,648 individuals in the US were under 1 year old, and we assume that half of them are under 6 months old. 19,175,798 individuals were under 5. Therefore, 9.923% of individuals under 5 are under 6 months old, so this percentage of 0–4 year olds in the simulation are designated to be “infants”.

There are an estimated 9 million health care and emergency services personnel with direct patient contact [10]. The simulation has about 118,420,000 employed adults in the continental US so 6.9% of them are randomly selected to be “essential.”

There are an estimated 4 million pregnant women in the US [10]. In the simulation, we assigned a fraction of individuals who were from 19–29 years old and 30–64 years old to be pregnant. We took the number of women in the different age groups from the 2000 Census and multiplied these by pregnancy rates [11] to determine the proportion of pregnant women from different age groups. To compute the number of pregnant 19-year-olds, we assumed that they comprised 1/5 of the US 2000 Census population of 15–19 year-olds and multiplied by the 18–19 year-old pregnancy rates. Our estimates of the number of pregnant women in each age group in 2000 is summarized in Web Table 4.

An estimated 6 million children 5 through 18 years of age have chronic medical conditions [10]. If children 5–18 are about 22% of the population, then 8.884% are in this category.

About 52.23% of the 2000 population was between 25 and 64. If we assume 52.23% of the current population is between 25 and 64 and 34 million have chronic health disorders or compromised immune systems [10], then 21.20% of individuals within these ages are at high risk. Web Table 5 summarizes these values.

**Web Table 4.** US Pregnancy Rates and Numbers by Age.

| Census Age Group | Female Pop (2000) | Pregnancy Rate (2004) | % of Pregnant Pop | # Pregnant |
|------------------|-------------------|-----------------------|-------------------|------------|
| 19               | 9828886/5         | 119/1000              | 4.03%             | 146613     |
| 20–24            | 9276187           | 164/1000              | 26.19%            | 953412     |
| 25–29            | 9582576           | 169/1000              | 27.88%            | 1014971    |
| 30–34            | 10188619          | 135/1000              | 23.68%            | 861970     |
| 35–39            | 11387968          | 76/1000               | 14.90%            | 542496     |
| 40–44            | 11312761          | 17/1000               | 3.311%            | 120538     |
| total            |                   |                       | 100.00%           | 3640000    |

**Web Table 5.** High-risk Segments of the Simulated Population by Age.

| Age Category        | Ages        | % of Population | % High Risk | % Pregnant |
|---------------------|-------------|-----------------|-------------|------------|
| Pre-school children | 0–4 years   | 6.80%           | 8.90%       | —          |
| School-age children | 5–18 years  | 22.00%          | 8.90%       | —          |
| Young adults        | 19–29 years | 28.90%          | 21.20%      | 2.62%      |
| Middle adults       | 30–64 years | 30.00%          | 21.20%      | 1.82%      |
| Old adults          | 65+ years   | 12.40%          | —           | —          |



## HOSPITALIZATION AND CASE FATALITY RATIOS

To estimate the pandemic H1N1 age-specific case fatality ratios (the proportion of symptomatic H1N1 cases that are fatal) and the age-specific case hospitalization ratios (the proportion of symptomatic cases due to H1N1 that require hospitalization), we draw on estimates of the total number of age-specific H1N1 cases, total number of age-specific H1N1 hospitalizations, and total number of age-specific H1N1 deaths in the US as reported by in [12] (Web Table 6).

We estimate the H1N1 hospitalization and mortality ratios by risk group (Web Table 7). Starting with the ratios in Web Table 6, we assume that some proportion of each group is “high risk” and their ratios of hospitalization and mortality are 6.4, 17.0, and 8.1 times higher than the rest of their age groups in 0–4 year olds, 5-18 year olds, and 19-64 year olds, respectively [13]. [13] assumes that 10% of children, 17% of younger adults, and all older adults are “high risk”. This is close to the ACIP estimates in which 8.9% of children and 21.2% of adults are high risk [10], which is what we use. We assume that high-risk individuals are no more likely to become infected or symptomatic than healthy individuals. Using the age-specific hospitalization and mortality ratios in Web Table 6, our ACIP estimates of the proportion of individuals who are high risk, and the ratio of high-risk to healthy hospitalization and mortality ratios from [13], we estimate the hospitalization and mortality ratios for high-risk and healthy individuals.

To calculate the number of deaths based on a simulation’s output, we use the mortality estimates for “healthy” individuals for the non-high risk, non-pregnant symptomatic individuals and the high-risk estimates for the high-risk and pregnant individuals, remembering not to double-count those who are both high risk and pregnant.

**Web Table 6.** Age-specific Pandemic H1N1 Influenza-related Cases, Hospitalizations, and Deaths in the USA From April 2009–April 10, 2010 (From Reference (1)).

| Age Group          | Cases <sup>1</sup> | Hospitalizations | Deaths |
|--------------------|--------------------|------------------|--------|
| 0–17 years         | 20 million         | 87,000           | 1,280  |
| 18–64 years        | 35 million         | 160,000          | 9,570  |
| 65 years and older | 6 million          | 27,000           | 1,620  |
| Total              | 60 million         | 274,000          | 12,470 |

**Web Table 7.** Age-specific Pandemic H1N1 Influenza-related Hospitalization and Mortality in the USA by Risk Group.

|                                        |           | 0–4 years | 5–18 years | 19–29 years | 30–64 years | 65+ years | Total  |
|----------------------------------------|-----------|-----------|------------|-------------|-------------|-----------|--------|
| Hospitalization ratios (per 100 cases) | Overall   | 0.4350    | 0.4350     | 0.4571      | 0.4571      | 0.4500    | 0.4492 |
|                                        | Healthy   | 0.2938    | 0.1795     | 0.1825      | 0.1825      | –         |        |
|                                        | High risk | 1.8803    | 3.0507     | 1.4781      | 1.4781      | –         |        |
| Case fatality ratios (per 100 cases)   | Overall   | 0.0064    | 0.0064     | 0.0273      | 0.0273      | 0.0270    | 0.0204 |
|                                        | Healthy   | 0.0043    | 0.0026     | 0.0109      | 0.0109      | –         |        |
|                                        | High risk | 0.0277    | 0.0449     | 0.0884      | 0.0884      | –         |        |

## SENSITIVITY OF RESULTS TO THE INITIAL NUMBER OF INFECTED INDIVIDUALS

In the Results section of the text, we describe the results of simulations of the continental United States in which 213,000 (0.08% of the population) are initially infected. Here, we show that this number can be reduced by 25% (159,750 infected) to 50% (106,500 infected) without greatly affecting the results (Web Figure 2). When the number is reduced by 90% (21,300), the epidemic is noticeably slowed (Web Figure 2).

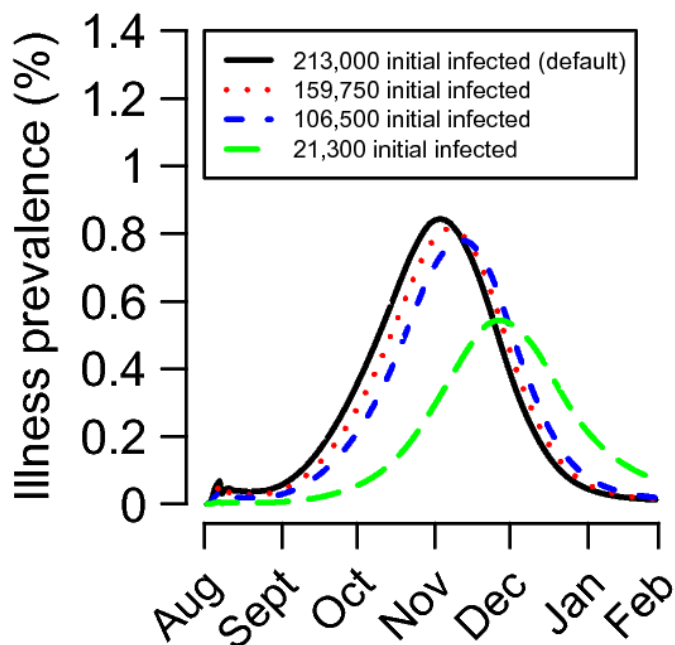

**Web Figure 2.** Plot of simulated illness prevalence in the continental United States for different numbers of initially infected people.

## EFFECT OF SCHOOL CLOSURES

We simulated the effect of closing schools for a week in Los Angeles County (Web Figure 3). Local transmission of influenza appeared to slow or stop when schools were closed, then resume when schools reopened. If all schools in the county are closed simultaneously for seven days, the epidemic curve shifts one week back. If each school closes reactively for seven days after a single student falls ill, then school closures slow but does not stop the epidemic. These simulations show that schools are a catalyst for community-wide influenza transmission, and that short-term school closures delay, but do not necessarily diminish influenza epidemics.

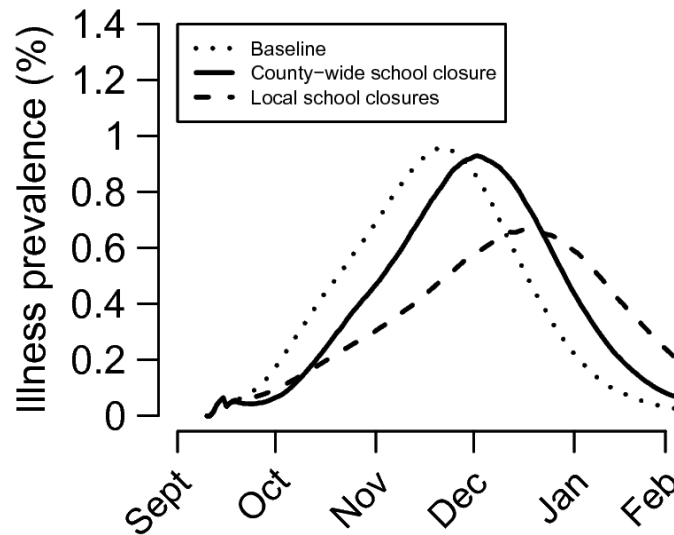

**Web Figure 3.** The effect of school closure on illness prevalence in simulations of Los Angeles County. The dotted line plots the baseline illness prevalence in which there is no vaccination or school closure. The solid line plots illness prevalence when all schools in the county are simultaneously closed for seven days. The dashed line plots illness prevalence when each school closes for seven days after a single student becomes ill in each one.

## REFERENCES

1. Reed C, Angulo FJ, Swerdlow DL, et al. Estimates of the prevalence of pandemic (H1N1) 2009, United States, April–July 2009. *Emerg Infect Dis.* 2009;15(2):2004–2007.
2. United States Census Bureau. U.S. population by age, sex, race, and Hispanic origin. Washington, DC: United States Census Bureau; 2009. Available from <http://www.census.gov/popest/national/asrh/files/NC-EST2008-ALLDATA-R-File22.csv>.
3. Halloran ME, Hayden FG, Yang Y, et al. Antiviral effects on influenza viral transmission and pathogenicity: Observations from household-based trials. *Am J Epidemiol.* 2007 Jan 15;165(2):212–21.
4. Carrat F, Vergu E, Ferguson NM, et al. Time lines of infection and disease in human influenza: a review of volunteer challenge studies. *Am J Epidemiol.* 2008 Apr 1;167(7):775–85.
5. Basta NE, Halloran ME, Matrajt L, et al. Estimating Influenza Vaccine Efficacy From Challenge and Community-based Study Data. *Am J Epidemiol.* 2008 Dec 15;168(12):1343–52.
6. Monto AS, Ohmit SE, Petrie JG, et al. Comparative efficacy of inactivated and live attenuated influenza vaccines. *N Engl J Med.* 2009 Sep 24;361(13):1260–7.
7. Centers for Disease Control and Prevention. Interim Results: Influenza A (H1N1) 2009 Monovalent Vaccination Coverage — United States, October–December 2009. *Morb Mortal Wkly Rep.* 2010;59(2):44–48.
8. Centers for Disease Control and Prevention. Estimated Availability of H1N1 Vaccine for Ordering by States and Territories, December 25, 2009. Atlanta, GA: Centers for Disease Control and Prevention; 2009.
9. Centers for Disease Control and Prevention. CDC Advisors Make Recommendations for Use of Vaccine Against Novel H1N1 [press release]. (July 29, 2009). Atlanta, GA: Centers for Disease Control and Prevention; 2009. <http://www.cdc.gov/media/pressrel/2009/r090729b.htm>. (Accessed August 5, 2009).
10. Neuzil K, Fiore A. Influenza Vaccine Workgroup Considerations. Meeting of the Advisory Committee on Immunization Practices (ACIP). <http://www.cdc.gov/vaccines/recs/acip/downloads/mtg-slides-jul09-flu/11-Flu-Fiore.pdf> (July 29, 2009). (Accessed August 5, 2009).
11. Ventura SJ, Abma JC, Mosher WD, et al. Estimated pregnancy rates by outcome for the United States, 1990–2004. *Natl Vital Stat Rep.* 2008 Apr 14;56(15):1–25, 28.
12. Centers for Disease Control and Prevention. CDC Estimates of 2009 H1N1 Influenza Cases, Hospitalizations and Deaths in the United States, April 2009 – April 10, 2010. Atlanta, GA: Centers for Disease Control and Prevention; 2009. Accessed June 7, 2010. Available from [http://www.cdc.gov/h1n1flu/estimates\\_2009\\_h1n1.htm](http://www.cdc.gov/h1n1flu/estimates_2009_h1n1.htm).
13. Weycker D, Edelsberg J, Halloran ME, et al. Population-wide benefits of routine vaccination of children against influenza. *Vaccine.* 2005 Jan 26;23(10):1284–93.
